# Supplementary material for: Augmented Reality for Perioperative Anxiety in Patients Undergoing Surgery: A Randomized Clinical Trial
Source: PubMed Central journal article supplement (PMC10436133; doi:10.1001/jamanetworkopen.2023.29310), 2023-08-17
Supplement: jamanetwopen-e2329310-s002.pdf [file jamanetwopen-e2329310-s002.pdf]

## Supplemental Online Content

Rizzo MG, Costello JP, Luxenburg D, Cohen JL, Alberti N, Kaplan LD. Augmented reality for perioperative anxiety in patients undergoing surgery: a randomized clinical trial. *JAMA Netw Open*. 2023;6(8):e2329310.  
doi:10.1001/jamanetworkopen.2023.29310

**eTable.** Patient-Reported VAS and Narcotic Pill Number at Postoperative Day 1 (POD1) and at Their Postoperative Visit

This supplemental material has been provided by the authors to give readers additional information about their work.

**eTable.** Patient-Reported VAS and Narcotic Pill Number at Postoperative Day 1 (POD1) and at Their Postoperative Visit

|                               | <b>AR (n = 24)</b> | <b>Control (n = 24)</b> | <b>P Value</b> |
|-------------------------------|--------------------|-------------------------|----------------|
| <b>VAS POD1 (SD)</b>          | 6.8 (2.8)          | 5.8 (3.4)               | 0.38           |
| <b>VAS Post-Op Visit (SD)</b> | 2.7 (2.0)          | 2.2 (2.1)               | 0.37           |
| <b>Pills POD1 (SD)</b>        | 1.5 (1.2)          | 1.2 (1.2)               | 0.31           |
| <b>Pills Total (SD)</b>       | 1.8 (1.3)          | 1.9 (1.3)               | 0.64           |

*N.B.* These data were collected at a single time-point at the time of their post-operative survey. Standard deviations (SD) are reported after means.
