# Supplementary material for: Augmented Reality for Perioperative Anxiety in Patients Undergoing Surgery: A Randomized Clinical Trial
Source: PubMed Central journal article supplement (PMC10436133; doi:10.1001/jamanetworkopen.2023.29310), 2023-08-17
Supplement: jamanetwopen-e2329310-s003.pdf [file jamanetwopen-e2329310-s003.pdf]

## **Data Sharing Statement**

Rizzo, Jr. Augmented Reality for Perioperative Anxiety in Patients Undergoing Surgery. *JAMA Netw Open*. Published August 17, 2023. doi:10.1001/jamanetworkopen.2023.29310

### **Data**

**Data available:** No
